## Darwin's finches can have taste preferences, but not for human foods

Lever, D.<sup>1</sup>, Rush, L. V.<sup>2</sup>, Thorogood, R.<sup>1,3,4,7</sup>, Gotanda, K. M.<sup>1,5,6,8\*</sup>

<sup>1</sup> Department of Zoology, University of Cambridge, Downing Street, Cambridge CB2 3EJ  
United Kingdom

<sup>2</sup> Department of Geology, Laurentian University, 935 Ramsey Lake Rd, Sudbury, Ontario, P3E  
2C6, Canada

<sup>3</sup> Helsinki Institute of Life Science (HiLIFE), University of Helsinki, Helsinki 00014, Finland.

<sup>4</sup> Research Program in Organismal and Evolutionary Biology, Faculty of Biological and  
Environmental Sciences, University of Helsinki, Helsinki 00014, Finland.

<sup>5</sup> Département de Biologie, Université de Sherbrooke, 2500, boul de l'Université, Sherbrooke,  
Québec, J1K 2R1, Canada

<sup>6</sup> Department of Biological Sciences, Brock University, 1812 Sir Isaac Brock Way, St.  
Catharine's, Ontario, L2S 3A1, Canada

<sup>7</sup> ORCID: 0000-0001-5010-2177

<sup>8</sup> ORCID: 0000-0002-3666-0700

\* To whom correspondence should be addressed: [kg419@cam.ac.uk](mailto:kg419@cam.ac.uk)

1 Abstract

2 Urbanization is rapidly changing ecological niches. On the Galapagos Islands, Darwin's finches  
3 consume human-introduced foods preferentially; however, it remains unclear why. Here we  
4 presented pastry with flavour profiles typical of human foods (oily, salty, sweet) to small and  
5 medium ground finches to test if latent taste preferences might drive selection of human foods. If  
6 human-food flavours were consumed more than a neutral or bitter control at sites with human  
7 foods, then we predicted tastes were acquired after experience with human foods; however, if no  
8 site-differences were found then this would indicate latent taste preferences. Contrary to both  
9 predictions, we found no evidence that human-food flavours were preferred compared to control  
10 flavours. Instead, medium ground finches consumed the bitter control pastry most and wiped  
11 their beaks more frequently after feeding on oily and sweet pastry (post-ingestion beak wiping  
12 can indicate aversions). Small ground finches showed no differences in consumption but wiped  
13 their beaks most after feeding on sweet pastry. Our results suggest that unlike many species,  
14 medium and small ground finches do not find bitter-tasting food aversive. Furthermore, taste  
15 preferences are unlikely to play a major role in Darwin's finches adaptation to the presence of  
16 human foods during increased urbanization.

17

18 Key words: *Geospiza fortis*, *Geospiza fuliginosa*, foraging, human influences, urbanization,  
19 Galapagos

20

## 21 **Introduction**

22 Human behaviour is now recognised to be a strong driver of local adaptation and differences  
23 among populations of animals [1,2]. Urbanization [3–5], for example, can have profound effects  
24 on foraging because humans often introduce novel foods to the surrounding environment either  
25 intentionally (e.g. via garden bird feeding [6,7]) or unintentionally (e.g. by planting ornamental  
26 plants [8,9]). This changes the diversity and availability of food items, and generates different  
27 foraging landscapes from those in which most animals evolved [10–12]. However, organism's  
28 responses to these altered niches vary, with some birds, for example, not only adapting more  
29 readily to incorporate human-foods into their diet, but even preferentially consuming them over  
30 more natural food sources [11,13–15]. These differences in if and how populations and species  
31 utilise human foods can then have consequences for local adaptation [7,16], potentially affect  
32 species divergence [17], or mediate the potential for invasive species to establish [18,19].  
33 Furthermore, the gut microbiome, which is increasingly recognised to affect a suite of  
34 physiological, immune, and cognitive functions in wild non-human animals [20,21], can also  
35 vary with consumption of human foods [22–24]. Nevertheless, understanding why some species  
36 in urban areas shift their diets to preferentially forage on human foods remains unclear.

37

38 Taste plays an important role in foraging as it allows individuals to detect nutritious  
39 versus unprofitable substances in food items [25,26]. Although it was long assumed to be of little  
40 importance for birds, they have sophisticated sensory adaptations with taste receptors identified  
41 for bitter [25,27,28], sweet [25], and salt [29] flavours. Furthermore, experiments have  
42 demonstrated that birds can use bitter tastes to avoid toxic foods [27,29,30], use sweet tastes to  
43 detect sugars [25,29,31–34] indicating high caloric content [35], and use salty tastes to detect

44 salts [34,36,37] indicative of necessary minerals and proteins [38]. Preferences for certain tastes  
45 can therefore evolve when flavours are linked to food quality and nutrient content [25]. For  
46 example, omnivorous and frugivorous birds are able to detect sugars at low levels and prefer  
47 sweet tastes compared to birds that forage on other types of food [29], presumably because this  
48 facilitates optimal foraging for caloric content of nectar and ripe fruit.

49  
50 Taste preferences can also be maladaptive, however, if they lead to the preferential  
51 consumption of human foods. The introduction of human foods in urban areas causes changes in  
52 resource availability, including calories and nutrient concentration [39] as much of the human  
53 foods accessible to birds consists of discarded ‘junk food’ and snacks that are high in fat, sugar,  
54 and salt. The availability of these foods can alter natural nutritional landscapes with detrimental  
55 effects [40]. For example, hibernation in mammals is perturbed when human foods are consumed  
56 [41,42], and racoons feeding on human foods in urbanised areas show greater weight and blood  
57 sugar content [43]. In birds, American crow (*Corvus brachyrhynchos*) chicks are smaller [44]  
58 and Canadian geese (*Branta canadensis maxima*) have higher rates of angel wing disorder in  
59 urbanised areas, likely as a result of nutrient deficiency [45], and Australian magpies  
60 (*Gymnorhina tibicen*) show alterations to blood chemistry following backyard provisioning [46].  
61 If animals are adapted to detect and prefer foods based on taste profiles that are coincidentally  
62 elevated in human foods, then they could assess these foods erroneously as high quality and  
63 favour consumption. On the other hand, if their taste receptors are adapted to prefer flavours  
64 characteristic of human foods, then they might be better able to take advantage of this newly  
65 available resource if natural foods decline (i.e. poor condition is preferable to starvation).  
66 Therefore, preferential consumption of different foods due to taste preferences, especially in the

67 context of urbanization, could be either adaptive or maladaptive. However, it remains largely  
68 unknown whether taste preferences actually underlie the preferential consumption of human  
69 foods in urban areas.

70

71 Here, we investigate if Darwin's finches, which are known to vary in their preferential  
72 consumption of human foods [11], have taste preferences for flavours associated with human  
73 foods. Darwin's finches are a model system for demonstrating how foraging ecology shapes  
74 adaptation into different ecological niches and results in an adaptive radiation [47,48].  
75 Contemporary work has shown that the presence of humans is affecting traits such as beak  
76 morphology [49] and this has been linked to the consumption of human foods [17]. Indeed, we  
77 know that Darwin's finches preferentially consume human foods including crisps (potato chips),  
78 biscuit (hard cookies), and rice at sites where these foods are abundant such as at tourist beaches  
79 and in urban areas [11]. Indeed, urban finches can have higher nesting success than non-urban  
80 finches [50], suggesting that at least some species of Darwin's finches can become locally  
81 adapted to urban environments. Thus, the Darwin's finches on the Galapagos represent an  
82 excellent opportunity to test whether taste preferences might underpin consumption of human  
83 foods where these are available and abundant, such as in urban areas or on tourist beaches.

84

85 We assessed taste preferences in Darwin's finches in separate populations with little to no  
86 movement of finches among sites [51] that varied in the availability of human foods previously  
87 shown to be attractive to finches [11]. We presented flavours in the absence of visual cues  
88 typical to human foods to exclude the role of learned associations with packaging (e.g. crisp  
89 packets [11]). If taste preferences arise because of the consumption of human foods, we

90 predicted finches at sites with human foods would only prefer flavours associated with human  
91 foods (e.g. sweet, salty, and oily) at sites where human foods are abundant. If taste preferences  
92 are innate (i.e. latent), we predicted preferences would occur for such flavours across sites,  
93 regardless of the presence or absence of human foods. Potential taste preferences can be  
94 quantified as variation in feeding rate, or as variation in post-feeding beak wiping rate [25,52–  
95 54]. Although beak wiping can clean the beak of debris [55], vigorous beak wiping commonly  
96 occurs after feeding on something unpalatable [25,54]. Therefore, we measured taste preferences  
97 in terms of consumption and beak wiping behaviour compared to two controls, neutral pastry  
98 that had no flavour added and bitter-flavoured pastry as a negative control. Bitter substances are  
99 aversive to many bird species, so we expected finches to consume less bitter-flavoured pastry  
100 compared to neutral or other flavoured pastry across all sites as well as to elicit more beak  
101 wiping behaviour [25,54] .

102

## 103 **Materials and Methods**

### 104 *Study species and location*

105 We focused on Darwin’s finches, an endemic group of passerines on the Galapagos Islands, at  
106 three sites on Santa Cruz Island that varied in their exposure to human foods (Supplemental  
107 Figure 1). The “remote” site was a non-urban site 12 km from the main urban town with no  
108 presence of human foods [22], the “beach” site was El Garrapatero beach, a non-urban site where  
109 visitors often bring picnics so human food is present and abundant (de León et al. 2018, Knutie  
110 et al. 2019), and the “town” site was Puerto Ayora, a fully urbanized town where humans and  
111 their food are ubiquitous [11]. The two focal species were small ground finches (*Geospiza*  
112 *fuliginosa*) and medium ground finches (*Geospiza fortis*). Galápagos mockingbirds (*Mimus*

113 *parvulus*) and two other finch species were also present occasionally, but rarely interacted with  
114 our experiments.

115

### 116 *Experimental protocol and video recording*

117 We performed trials at each of the three sites (remote = 16 trials, beach = 15 trials, and  
118 town = 18 trials; Supplemental Table 1) using a ‘cafeteria’ experiment [11]. Five cups the size of  
119 ½ a plastic egg were randomly positioned in the periphery of a 3x3 egg carton and placed on the  
120 ground on a white plate. The central dimple of the egg carton was weighted with a small rock,  
121 and the unused dimples were left empty. The trial began when the first bird approached the tray  
122 and fed, and then continued for 10 minutes [11]. If no finches fed, the trial was aborted after 20  
123 minutes. All trials were performed from February 20<sup>th</sup> to March 25<sup>th</sup>, 2018, between 6am and  
124 11am, or 3pm and 6pm and were filmed using a video camera (Sony HDR-CX625 Full HD  
125 Compact Camcorder or Canon 7D Mark II with 100-400mm lens) positioned 10 metres from the  
126 cafeteria plate. The majority of individuals were not uniquely identifiable, so we cannot be sure  
127 that birds participating in different trials were independent. To reduce the potential for pseudo-  
128 replication between trials, we moved the location of the cafeteria experiment for each trial by at  
129 least 100 m within the study locations.

130 Each cup was filled with 2.5 g of pastry made from flour, unsalted butter, and water,  
131 following methods from Speed and colleagues (2000). The pastry was flavoured according to  
132 commonly available human-foods in the environment [11] and each cup was coloured (blue,  
133 green, pink, purple, and yellow) to facilitate recognition of the contents: (i) blue indicated high in  
134 fat (6g vegetable oil/pastry batch), (ii) green indicated bitter (0.1g quinine/pastry batch), (iii)  
135 purple indicated sweet (23g sugar/pastry batch), (iv) yellow indicated salty (1.333g salt/pastry

136 batch), and (v) pink indicated neutral or unflavoured pastry. To habituate the birds to the  
137 experimental set-up, we first conducted trials at each site with only unflavoured pastry (remote =  
138 17 trials, beach = 17 trials, town = 19 trials; Supplemental Materials, Supplemental Table 1).  
139 Birds can have latent colour preferences, either from experience or evolutionary history.  
140 However, we detected no strong biases within finch species towards, or against, any of the  
141 coloured cups based on these trials (Supplemental Materials; Supplemental Table 2;  
142 Supplemental Figures 2 & 3).

143

#### 144 *Video analysis*

145 Videos were analysed using BORIS (Behavioral Observation Research Interactive Software)  
146 (Friard and Gamba, 2016) and each 10-minute trial was analysed by one observer (DL). As most  
147 birds (fewer than 4%) were not individually identifiable, we counted the number of feeding  
148 events at the level of the trial and assigned these to each species of finch based on their body size  
149 and beak morphology. We defined a feeding event as when a bird's beak was submerged into a  
150 cup, lifted, and then food was consumed. If at least one cup was visited during a trial, any cups  
151 not visited received a score of 0. Following each feeding event, we then recorded the number of  
152 times the finch wiped its beak on a surface within 20 seconds in accordance with published  
153 methods on beak wiping [54,55].

154

#### 155 *Statistical analyses*

156 Statistical analyses were undertaken using the R environment version 4.0.2 (R Core team, 2020;  
157 analyses code and data are available as Supplemental Materials). To analyse differences in taste  
158 preferences, we used generalised linear mixed-effect models (GLMMs) with a negative binomial



159 error distribution (using the `glmer.nb()` function in the `lme4` package; Bates et al. 2015) to  
160 account for overdispersion in the number of feeding events (response variable). Trial number  
161 was included as a random effect to account for non-independence of feeding events within trials  
162 and the fixed effects were site, pastry flavour, and their interaction. If the interaction did not  
163 contribute significantly to model fit (using a likelihood ratio test to compare with a simpler  
164 model containing only additive fixed effects) it was removed, but site and pastry flavour were  
165 retained in all models. We then used z-tests to assess the significance of differences in  
166 consumption among pastry flavour and site using ‘neutral flavour (pink)’ and ‘town’ as the  
167 reference level (i.e. intercept). We report estimates and standard errors and provide incidence  
168 rate or odds ratios to compare effects.

169         The number of beak wipes following a feeding event were low (5 or fewer) and highly  
170 right-skewed (medium ground finch = 3.69, small ground finch = 3.44; calculated using the  
171 ‘moments’ package; Komsta and Novomestky 2015) so we therefore we modelled the  
172 occurrences of beak wipes using a binomial distribution, where the denominator in the response  
173 variable was the number of feeding events when no beak wipes occurred. Assumptions of  
174 homogeneity of variance and uniformity of the residuals for all models were checked using  
175 Kolmogorov-Smirnov tests for uniformity, simulation tests for dispersion, and a binomial test for  
176 outliers (implemented using the ‘DHARMA’ package [58]). The cactus finch and small tree finch  
177 rarely came to the experimental trays so only medium and small ground finches were included in  
178 the data set. Furthermore, attendance of medium ground finches at beach trials was very low and  
179 they did not feed from all cups in any trial. Therefore, data from this location were excluded for  
180 medium ground finches and the two species were analysed separately.

181

## 182 **Results**

183 A total of 53 taste preference trials were conducted across three sites. Both medium and  
184 small ground finches varied in their propensity to participate in experimental trials at different  
185 locations. Medium ground finches participated at 16 of the 16 trials conducted at remote sites, 0  
186 of the 15 trials conducted at beach sites, and in 10 of the 18 trials conducted at town sites. Small  
187 ground finches participated at 10 of the 16 trials conducted at remote sites, 15 of the 15 trials  
188 conducted at beach sites, and 14 of the 18 trials conducted at town sites (Supplemental Table 1).

189

### 190 *Medium ground finches*

191 Medium ground finches engaged in significantly more feeding events at the remote site  
192 than the town site (Table 1, Figure 1C, Supplemental Table 1b), but we found no evidence that  
193 taste preferences differed according to location (location\*flavour-type:  $\chi^2 = 4.687$ , d.f. = 4, p =  
194 0.321). Medium ground finches did, however, differ in their feeding events with respect to  
195 flavour-type (flavour-type:  $\chi^2 = 11.810$ , d.f. = 4, p = 0.019), with significantly more feeds  
196 occurring on the bitter (green) pastry than the neutral flavoured pastry (Table 1; Figure 1A &  
197 1C). No other flavour-types were consumed more frequently than the neutral pastry (Table 1;  
198 Figure 1A & 1C). We next assessed behavioural wiping responses to each flavour-type (Figure  
199 1B & 1D). However, as there were fewer than 10 trials at town sites where each flavour was  
200 consumed (neutral (pink): N = 5, oily (blue): N = 5, bitter (green): N = 8, sweet (purple): N = 3,  
201 salty (yellow): N = 6); we could not test whether responses to specific flavour-types differed  
202 among the locations. Overall, medium ground finches were more likely to wipe their beaks after  
203 consuming oily (blue; 14.7% of feeding events) or sweet (purple; 15.5% of feeding events)  
204 flavours than after consuming neutral flavoured pastry (pink; Table 1; Figure 1B & 1D) and

205 wiped their beaks the least after consuming bitter (green; 5% less than after consuming neutral  
206 pastry (Figure 1D)). Beak wiping also tended to occur more often after feeding events at town  
207 sites compared to remote sites, although this was not significant (Table 1, Figure 1B & 1D).  
208 Together, these results suggest that medium ground finches consumed bitter-flavoured pastry the  
209 most (at both town and remote sites) yet wiped their beaks the least after feeding on this flavour.  
210

### 211 *Small ground finches*

212 Small ground finches, on the other hand, showed no significant differences in their feeding  
213 preferences (Figure 2), either among flavour-types ( $\chi^2 = 1.160$ , d.f. = 4,  $p = 0.885$ , Table 1;  
214 Figure 2A & 2C), among the three sites ( $\chi^2 = 2.866$ , d.f. = 2,  $p = 0.239$ ; town vs. beach estimate  
215 =  $0.424 \pm 0.319$ ,  $z = 1.329$ ,  $p = 0.184$ ; town vs. remote estimate =  $-0.112 \pm 0.357$ ,  $z = -0.315$ ,  $p =$   
216  $0.753$ ; Table 1; Figure 2A & 2C), or in interaction ( $\chi^2 = 4.728$ , d.f. = 8,  $p = 0.786$ ; Table 1;  
217 Figure 2A & 2C). Overall, while there were no differences among locations in the proportion of  
218 feeding events that led to beak wiping ( $\chi^2 = 2.298$ , d.f. = 2,  $p = 0.317$ ; Table 1; Figure 2B & 2D),  
219 small ground finches were 63% more likely to wipe their beaks after consuming sweet-flavoured  
220 (purple) rather than neutral pastry (pink; Figure 2D). There were no significant differences  
221 between other flavours and neutral-flavoured pastry (Table 1; Figure 2B & 2D). The number of  
222 feeding trials where each flavour was consumed were too few to statistically test for location-  
223 specific differences in beak-wiping responses to flavours. Nevertheless, together the feeding  
224 events and beak wiping data suggest that small ground finches show little discrimination of foods  
225 based on human-food flavours, regardless of location.

226

### 227 **Discussion**

228 Taste preferences have often been overlooked in understanding animals' foraging decisions, yet  
229 in human-modified environments, latent taste preferences could explain why some species are  
230 able to readily adapt to novel foods while others do not. Here we investigated if taste preferences  
231 can explain preferential consumption of human foods by Darwin's finches [11]. We predicted  
232 that if finches at sites with more exposure to human foods (i.e. at the tourist beach or in town)  
233 showed greater consumption and reduced aversive behavioural responses to flavours typical of  
234 these foods (salty, oily, sweet), then taste preferences could have developed from experience  
235 with the changed foraging landscape. However, if finches across sites preferred these 'human-  
236 food flavours' then latent taste preferences could have facilitated rapid adoption of human foods  
237 into the diet. Against both predictions, the only evidence we detected for a taste preference was  
238 that medium ground finches favoured the bitter-flavoured control. Medium ground finches fed  
239 most often on the bitter-flavoured pastry and wiped their beaks the least following its ingestion.  
240 This was surprising, given that bitter-tasting foods often elicit increased beak wiping in birds  
241 [25,54]. It is possible that our sample sizes were too small to detect preferences for human-food  
242 flavours, or that we did not add sufficient flavour to the pastry to be detectable. However,  
243 previous work detecting taste preferences had smaller sample sizes than our study ([e.g. 31 (n =  
244 6/group), 32 (n = 11), 33 (n = 6 and 10)], and the amount of flavour we added to the pastry  
245 emulated human foods as closely as possible. It therefore seems unlikely that our results can only  
246 be explained by methodological issues. Since Darwin's finches consume human foods  
247 preferentially when available, why did we not find preferences for flavours associated with  
248 commonly available human foods?  
249

250           It could be that Darwin's finches have not evolved a preference for tastes associated with  
251 human foods because these species are generalist feeders, especially during periods of non-  
252 drought [10]. Taste preferences evolve when they allow animals to identify food items that offer  
253 important nutrients (e.g., high in lipids, salts, or sugars)[25,26,29,40]. Yet for generalists, it  
254 might not be adaptive to have latent taste preferences if these limit individuals from consuming a  
255 wide variety of dietary items [10] or they might not need to discern specific foods that are high in  
256 lipids, salts, or sugars. Indeed, many studies that have found taste preferences in birds have been  
257 conducted with specialists [32,33]. Another possibility is that Darwin's finches have not yet  
258 acquired preferences for flavours associated with human foods. At the tourist beach site, easy  
259 access to the public only became available around 2010 (J. Podos, personal communication), and  
260 the town of Puerto Ayora was established in 1926 [59; E. Hennessey, personal communication],  
261 so perhaps not enough generations have passed from when finches gained access to human foods  
262 for finches to acquire taste preferences.

263  
264           For the medium ground finch, we found that the bitter taste is preferred across sites  
265 (Figure 1; Table 1), suggesting a latent taste preference for bitter, and the presence or absence of  
266 human foods did not correlate with different taste preferences as predicted. We also found a lack  
267 of aversion to bitter pastry in both species with finches not wiping their bills more after  
268 consuming bitter pastry. This was unexpected because we know birds possess TAS2R bitter taste  
269 receptors [28], and often discriminate against toxic prey via bitterness. In fact, of the species  
270 studied by Wang and Zhao [28], medium ground finches had the second most TAS2R genes. So  
271 why would medium ground finches prefer bitter tastes as opposed to being averse? If the natural  
272 foods found at remote sites are bitter in taste, that might explain why medium ground finches

273 have a latent preference for bitter tastes. Bitter tastes are often associated with aposematic prey,  
274 and the relative lack of aposematic prey on the Galapagos [60] suggests finches do not need to  
275 develop an aversion to bitter tastes as shown by the preferential consumption of bitter tastes and  
276 not wiping their bills after consuming bitter pastry. Another possibility is zoopharmacognosy,  
277 where animals eat medicinally advantageous foods, despite possible aversive qualities. This is  
278 common in birds; great bustards (*Otis tarda*) ingest toxic blister beetles to control digestive tract  
279 parasites [61] , and house sparrows (*Passer domesticus*) ingest leaves containing quinine (our  
280 bittering agent) during malaria outbreaks [62], alleviating symptoms. Quinine is an invasive  
281 plant found on the Galapagos. However, no finch has ever been observed consuming quinine  
282 (Heinke Jäger, personal communication), so this possibility is unlikely.

283

284         The Galapagos Islands are experiencing an exponential increase in urbanization and  
285 tourism, including permanent human residents [63], and we know Darwin's finches  
286 preferentially consume human foods over natural food sources when readily available [11].  
287 However, here we found no taste preferences for flavours associated with human foods. It  
288 therefore seems likely that finches do not have latent preferences for these flavours, nor acquired  
289 a preference through repeated exposure to human foods. Why then have Darwin's finches  
290 adapted rapidly to changing food availability and incorporated human foods into their diet? One  
291 possibility is that they could be attracted to other sensory cues such as aural or visual cues  
292 associated with human foods. For example, in town and on the beach (but not in remote areas),  
293 finches respond to brightly coloured visual cues of human food packaging and are attracted to  
294 the 'crinkle' sound associated with foil and plastic food packaging [Supplemental Figure 4; 11].  
295 Alternatively, it could be driven by availability itself at the beach and town sites. While the food

296 sources Darwin's finches normally feed upon are available within town and at the beach [11], the  
297 abundance of human foods at these sites simply make these more accessible to finches, and  
298 therefore, finches did not need to discriminate between different flavours typically associated  
299 with human foods and aversive flavours to expand their diet diversity [11]. Further work is  
300 required to understand the mechanisms underlying how Darwin's finches developed a preference  
301 for consuming human foods at sites where human foods are readily available.

302

303 Humans, through processes such as urbanization, can have a major impact on foraging ecology  
304 by introducing novel foods that can become preferentially consumed by birds [13,14]. However,  
305 the mechanisms leading to changes in foraging ecology remain largely unknown. Although we  
306 cannot yet explain *why* Darwin's finches prefer human foods, our results help to rule out the  
307 possibility that taste preferences play an important role in incorporating human foods into their  
308 diets. Similarly, our finding that ground finches do not find bitter tastes aversive expands the  
309 increasing knowledge on variation in response to tastes among species. As the adoption of  
310 human foods into animals' diets can have cascading effects on health, reproduction, and fitness  
311 [6,12,16,41,43], it remains of paramount importance to elucidate why some species integrate  
312 these foods while others do not.

313

#### 314 **Author contributions**

315 KMG and RT designed the study, KMG and LVR collected the field data, DL analyzed the  
316 videos, RT, DL, and KMG analyzed the data, and all authors wrote and edited the manuscript.

317

#### 318 **Acknowledgements**

319 We thank Lotte Skovmand for their assistance with field work and Nick Davies for their  
320 assistance with the research project. During this study, RT was supported by an Independent  
321 Research Fellowship from the Natural Environment Research Council UK (NE/K00929X/1) and  
322 a start-up grant from the Helsinki Institute of Life Science (HiLIFE), University of Helsinki.  
323 KMG was funded by Christ's College and Clare Hall at the University of Cambridge and was  
324 supported by Banting Postdoctoral Fellowship from the Natural Sciences and Engineering  
325 Research Council of Canada.  
326



327 **References**

- 328 1. Hendry AP, Gotanda KM, Svensson EI. 2017 Human influences on evolution, and the  
329 ecological and societal consequences. *Philos. Trans. R. Soc. B* **372**, 20160028.  
330 (doi:10.1098/rstb.2016.0028)
- 331 2. Sullivan AP, Bird DW, Perry GH. 2017 Human behaviour as a long-term ecological driver  
332 of non-human evolution. *Nat. Ecol. Evol.* **1**, 0065. (doi:10.1038/s41559-016-0065)
- 333 3. Johnson MTJ, Munshi-South J. 2017 Evolution of life in urban environments. *Science*  
334 **358**, eaam8237. (doi:10.1126/science.aam8327)
- 335 4. Alberti M, Marzluff J, Hunt VM. 2017 Urban driven phenotypic changes: empirical  
336 observations and theoretical implications for eco-evolutionary feedback. *Philos. Trans. R.*  
337 *Soc. B* **372**, 20160029. (doi:10.1098/rstb.2016.0029)
- 338 5. Alberti M, Correa C, Marzluff JM, Hendry AP, Palkovacs EP, Gotanda KM, Hunt VM,  
339 Apgar TM, Zhou Y. 2017 Global urban signatures of phenotypic change in animal and  
340 plant populations. *Proc. Natl. Acad. Sci.* **114**, 8651–8956. (doi:10.1073/pnas.1606034114)
- 341 6. Shutt JD, Trivedi UH, Nicholls JA. 2021 Faecal metabarcoding reveals pervasive long-  
342 distance impacts of garden bird feeding. *Proc. R. Soc. London B-Biological Sci.* **288**,  
343 20210480. (doi:10.1098/rspb.2021.0480)
- 344 7. Badyaev A V, Young RL, Oh KP, Addison C. 2008 Evolution on a local scale:  
345 developmental, functional, and genetic bases of divergence in bill form and associated  
346 changes in song structure between adjacent habitats. *Evolution* **62**, 1951–1964.  
347 (doi:10.1111/j.1558-5646.2008.00428.x)
- 348 8. Marco A, Lavergne S, Dutoit T, Bertaudiere-Montes V. 2010 From the backyard to the  
349 backcountry: how ecological and biological traits explain the escape of garden plants into

- 350 Mediterranean old fields. *Biol. Invasions* **12**, 761–779. (doi:10.1007/s10530-009-9479-3)
- 351 9. Gelmi-Candusso TA, Hämäläinen AM. 2019 Seeds and the city: the interdependence of  
352 zoochory and ecosystem dynamics in urban environments. *Front. Ecol. Evol.* **7**, 1–19.  
353 (doi:10.3389/fevo.2019.00041)
- 354 10. De León LF, Podos J, Gardezi T, Herrel A, Hendry AP. 2014 Darwin’s finches and their  
355 diet niches: the sympatric coexistence of imperfect generalists. *J. Evol. Biol.* **27**, 1093–  
356 1104. (doi:10.1111/jeb.12383)
- 357 11. De León LF, Sharpe DMT, Gotanda KM, Raeymaekers JAM, Chaves JA, Hendry AP,  
358 Podos J. 2018 Urbanization erodes niche segregation in Darwin’s finches. *Evol. Appl.* **12**,  
359 132–1343. (doi:10.1111/eva.12721)
- 360 12. Fuirst M, Veit RR, Hahn M, Dheilly N, Thorne LH. 2018 Effects of urbanization on the  
361 foraging ecology and microbiota of the generalist seabird *Larus argentatus*. *PLoS One* **13**,  
362 e0209200. (doi:10.1371/journal.pone.0209200)
- 363 13. Sol D, Santos DM, Garcia J, Cuadrado M. 1998 Competition for food in urban pigeons:  
364 the cost of being juvenile. *Condor* **100**, 298–304. (doi:10.2307/1370270)
- 365 14. Marzluff JM, Neatherlin E. 2006 Corvid response to human settlements and campgrounds:  
366 causes, consequences, and challenges for conservation. *Biol. Conserv.* **130**, 301–314.  
367 (doi:10.1016/j.biocon.2005.12.026)
- 368 15. Lowry H, Lill A, Wong BBM. 2013 Behavioural responses of wildlife to urban  
369 environments. *Biol. Rev.* **88**, 537–549. (doi:10.1111/brv.12012)
- 370 16. Bosse M *et al.* 2017 Recent natural selection causes adaptive evolution of an avian  
371 polygenic trait. *Science* **358**, 365 LP – 368. (doi:10.1126/science.aal3298)
- 372 17. De León LF, Raeymaekers JAM, Bermingham E, Podos J, Herrel A, Hendry AP. 2011

- 373 Exploring possible human influences on the evolution of Darwin's finches. *Evolution* **65**,  
374 2258–2272. (doi:10.1111/j.1558-5646.2011.01297.x)
- 375 18. Snyder WE, Evans EW. 2006 Ecological effects of invasive arthropod generalist  
376 predators. *Annu. Rev. Ecol. Evol. Syst.* **37**, 95–122.  
377 (doi:10.1146/annurev.ecolsys.37.091305.110107)
- 378 19. Shik JZ, Dussutour A. 2020 Nutritional dimensions of invasive success. *Trends Ecol.*  
379 *Evol.* **35**, 691–703. (doi:10.1016/j.tree.2020.03.009)
- 380 20. Davidson GL, Cooke AC, Johnson CN, Quinn JL. 2018 The gut microbiome as a driver of  
381 individual variation in cognition and functional behaviour. *Philos. Trans. R. Soc. B* **353**,  
382 20170286. (doi:10.1098/rstb.2017.0286)
- 383 21. Davidson GL, Raulo A, Knowles SCL. 2020 Identifying microbiome-mediated behaviour  
384 in wild vertebrates. *Trends Ecol. Evol.* **35**, 972–980. (doi:10.1016/j.tree.2020.06.014)
- 385 22. Knutie SA, Chaves JA, Gotanda KM. 2019 Human activity can influence the gut  
386 microbiota of Darwin's finches in the Galapagos Islands. *Mol. Ecol.* **28**, 2441–2450.  
387 (doi:10.1111/mec.15088)
- 388 23. Littleford-Colquhoun BL, Frere CH, Weyrich LS, Kent N. 2019 City life alters the gut  
389 microbiome and stable isotope profiling of the eastern water dragon (*Intellagama*  
390 *lesueurii*). *Mol. Ecol. Evol.* **28**, 4592–4607. (doi:10.1111/mec.15240)
- 391 24. Teysier A, Matthysen E, Hudin NS, Neve L De, White J, Lens L. 2020 Diet contributes  
392 to urban-induced alterations in gut microbiota: experimental evidence from a wild  
393 passerine. *Proc. R. Soc. B-Biological Sci.* **287**, 20192182. (doi:10.1098/rspb.2019.2182)
- 394 25. Rowland HM, Parker MR, Jiang P, Reed DR, Beauchamp GK. 2014 Comparative Taste  
395 Biology with Special Focus on Birds and Reptiles. In *Handbook of Olfaction and*

- 396 *Gustation, 4th Edition* (ed RL Doty), pp. 957–982. Jon Wiley and Sons.
- 397 26. Skelhorn J, Halpin CG, Rowe C. 2016 Learning about aposematic prey. *Behav. Ecol.* **27**,  
398 955–964. (doi:10.1093/beheco/arw009)
- 399 27. Li D, Zhang J. 2013 Diet shapes the evolution of the vertebrate bitter taste receptor gene  
400 repertoire. *Mol. Biol. Evol.* **31**, 303–309. (doi:10.1093/molbev/mst219)
- 401 28. Wang K, Zhao H. 2015 Birds generally carry a small repertoire of bitter taste receptor  
402 genes. *Genome Biol. Evol.* **7**, 2705–15. (doi:10.1093/gbe/evv180)
- 403 29. Clark L, Hagelin J, Werner S. 2014 The Chemical Senses in Birds. In *Sturkie's Avian*  
404 *Physiology*, pp. 89–111.
- 405 30. Davis JK *et al.* 2010 Evolution of a bitter taste receptor gene cluster in a New World  
406 sparrow. *Genome Biol. Evol.* **2**, 358–370. (doi:10.1093/gbe/evq027)
- 407 31. Avery ML, Schreiber CL, Decker DG. 1999 Fruit sugar preferences of House Finches.  
408 *Wilson Ornithol. Soc.* **111**, 84–88.
- 409 32. Lotz CN, Nicolson SW. 1996 Sugar preferences of a nectarivorous passerine bird, the  
410 Lesser Double-Collared Sunbird (*Nectarinia Chalybea*). *Funct. Ecol.* **10**, 360.  
411 (doi:10.2307/2390284)
- 412 33. Schondube JE, del Rio CM. 2003 Concentration-dependent sugar preferences in nectar-  
413 feeding birds: mechanisms and consequences. *Funct. Ecol.* **17**, 445–453.  
414 (doi:10.1046/j.1365-2435.2003.00749.x)
- 415 34. Matson KD, Millam JR, Klasing KC. 2001 Thresholds for sweet, salt, and sour taste  
416 stimuli in cockatiels (*Nymphicus hollandicus*). *Zoo Biol.* **20**, 1–13. (doi:10.1002/zoo.1001)
- 417 35. Drewnowski A, Mennella JA, Johnson SL, Bellisle F. 2012 Sweetness and food  
418 preference. *J. Nutr.* , 1142–1148. (doi:10.3945/jn.111.149575.1142S)

- 419 36. Bartholomew GA, Cade TJ. 1958 Effects of sodium chloride on the water consumption of  
420 house finches. *Physiol. Zool.* **31**, 304–310. (doi:10.1086/physzool.31.4.30160936)
- 421 37. Duncan CJ. 1960 The sense of taste in birds. *Proc. Assoc. Appl. Biol.* **4**, 409–414.
- 422 38. van Dongen MV, van den Berg MC, Vink N, Kok FJ, de Graaf C. 2012 Taste – nutrient  
423 relationships in commonly consumed foods. *Br. J. Nutr.* **108**, 140–147.  
424 (doi:10.1017/S0007114511005277)
- 425 39. Shochat E, Warren PS, Faeth SH, Mcintyre NE, Hope D. 2007 From patterns to emerging  
426 processes in mechanistic urban ecology. *Trends Ecol. Evol.* **21**, 186–191.  
427 (doi:10.1016/j.tree.2005.11.019)
- 428 40. Coogan SCP, Raubenheimer D, Zantis SP, Machovsky-Capuska GE, Coogan, Sean C. P.  
429 Raubenheimer D, Zantis SP, Machovsky-Capuska GE. 2018 Multidimensional nutritional  
430 ecology and urban birds. *Ecosphere* **9**, e02177. (doi:10.1002/ecs2.2177)
- 431 41. Kirby R, Johnson HE, Alldredge MW, Pauli JN. 2019 The cascading effects of human  
432 food on hibernation and cellular aging in free-ranging black bears. *Sci. Rep.* **9**, 2197.  
433 (doi:10.1038/s41598-019-38937-5)
- 434 42. Newsome D, Rodger K. 2008 To feed or not to feed: a contentious issue in wildlife  
435 tourism. *Aust. Zool.* **34**, 255–270. (doi:10.7882/fs.2008.029)
- 436 43. Schulte-Hostedde AI, Mazal Z, Jardine CM, Gagnon J. 2018 Enhanced access to  
437 anthropogenic food waste is related to hyperglycemia in raccoons (*Procyon lotor*).  
438 *Conserv. Physiol.* **6**, 1–6. (doi:10.1093/conphys/coy026)
- 439 44. Heiss RS, Clark AB, McGowan KJ. 2009 Growth and nutritional state of American Crow  
440 nestlings vary between urban and rural habitats. *Ecol. Appl.* **19**, 829–839.  
441 (doi:10.1890/08-0140.1)

- 442 45. Kreeger TJ, Waiser MM. 1984 Carpometacarpal deformity in giant Canada Geese (*Branta*  
443 *canadensis maxima* Delacour). *J. Wildl. Dis.* **20**, 245–248.
- 444 46. Ishigame G, Baxter GS, Lisle AT. 2006 Effects of artificial foods on the blood chemistry  
445 of the Australian magpie. In *Austral Ecology*, pp. 199–207. John Wiley & Sons, Ltd.  
446 (doi:10.1111/j.1442-9993.2006.01580.x)
- 447 47. Grant PR. 1991 Natural selection and Darwin’s finches. *Sci. Am.* **265**, 82–87.  
448 (doi:10.2307/24938761)
- 449 48. Grant PR, Grant RB. 2008 *How and Why Species Multiply: The Radiation of Darwin’s*  
450 *Finches*. Princeton, New Jersey, USA: Princeton University Press.
- 451 49. Hendry AP, Grant PR, Grant RB, Ford HA, Brewer MJ, Podos J. 2006 Possible human  
452 impacts on adaptive radiation: beak size bimodality in Darwin’s finches. *Proc. R. Soc. B*  
453 *Biol. Sci.* **273**, 1887–1894. (doi:10.1098/rspb.2006.3534)
- 454 50. Harvey JA, Chernicky K, Simons SR, Verrett TB, Chaves JA, Knutie SA. 2021 Urban  
455 living influences the nesting success of Darwin’s finches in the Galápagos Islands. *Ecol.*  
456 *Evol.* (doi:10.1002/ece3.7360)
- 457 51. De León LF, Bermingham E, Podos J, Hendry AP. 2010 Divergence with gene flow as  
458 facilitated by ecological differences: within-island variation in Darwin’s finches. *Philos.*  
459 *Trans. R. Soc. B-Biological Sci.* **365**, 1041–1052. (doi:10.1098/rstb.2009.0314)
- 460 52. Skelhorn J, Rowe C. 2006 Predator avoidance learning of prey with secreted or stored  
461 defences and the evolution of insect defences. *Anim. Behav.* **72**, 827–834.  
462 (doi:https://doi.org/10.1016/j.anbehav.2005.12.010)
- 463 53. Hämäläinen L, Rowland HM, Mappes J, Thorogood R. 2017 Can video playback provide  
464 social information for foraging blue tits? *PeerJ* **5**, e3062. (doi:10.7717/peerj.3062)

- 465 54. Hämäläinen L, Mappes J, Thorogood R, Valkonen JK, Karttunen K, Salmi T, Rowland  
466 HM. 2020 Predators' consumption of unpalatable prey does not vary as a function of bitter  
467 taste perception. *Behav. Ecol.* **31**, 383–392. (doi:10.1093/beheco/arz199)
- 468 55. Cuthill I, Witter M, Clarke L. 1992 The function of bill-wiping. *Anim. Behav.* **43**, 103–  
469 115. (doi:[https://doi.org/10.1016/S0003-3472\(05\)80076-4](https://doi.org/10.1016/S0003-3472(05)80076-4))
- 470 56. Bates DM, Maechler M, Bolker BM, Walker S. 2015 Fitting linear mixed-effects models  
471 using lme4. *J. Stat. Softw.* **67**, 1–48.
- 472 57. Komsta L, Novomestky F. 2015 MOMENTS: Moments, cumulants, skewness, kurtosis  
473 and related tests.
- 474 58. Hartig F. 2020 DHARMA: Residual Diagnostics for Hierarchical (Multi-Level / Mixed)  
475 Regression Models.
- 476 59. Fitter J, Fitter D, Hosking D. 2016 *Wildlife of the Galápagos*. 2nd edn. Princeton, New  
477 Jersey: Princeton University Press.
- 478 60. Roque-Albelo L, Schroeder FC, Conner WE, Bezzerides A, Hoebeke ER, Meinwald J,  
479 Eisner T. 2002 Chemical defense and aposematism: the case of *Utetheisa galapagensis*.  
480 *Chemoecology* **157**, 153–157. (doi:10.1007/s00012-002-8341-6)
- 481 61. Bravo C, Bautista LM, García M, Blanco G, Alonso JC. 2014 Males of a strongly  
482 polygynous species consume more poisonous food than females. *PLoS One* **9**, e111057.  
483 (doi:10.1371/journal.pone.0111057)
- 484 62. Shuker KPN. 2001 *The Hidden Power of Animals*. Readers Digest.
- 485 63. Watkins G, Cruz F. 2007 Galapagos at risk: a socioeconomic analysis of the situation in  
486 the archipelago.
- 487

488 Tables

489 Table 1. Mean differences ( $\pm$  S.E.) in the (I) number of feeding events and (II) proportion of  
 490 feeding events followed by beak wiping by (a) medium ground finches and (b) small ground  
 491 finches from coloured cups containing pastry flavoured to be salty (yellow), sweet (purple),  
 492 bitter (green), or oily (blue). Differences in (I) were estimated using generalised linear mixed  
 493 effects models with a negative binomial error distribution and where trial and site were included  
 494 as random effects. Differences in (II) were estimated using a similar model but with a binomial  
 495 error distribution to account for proportional response data. ‘Neutral’, unflavoured pastry was set  
 496 as the intercept (in parentheses) in all models.

|                            | I. Feeding events                   |              |              | II. Beak wiping                     |              |              |
|----------------------------|-------------------------------------|--------------|--------------|-------------------------------------|--------------|--------------|
|                            | Mean difference<br>$\pm$ S.E.       | Z            | p            | Mean difference<br>$\pm$ S.E.       | Z            | p            |
| (a) Medium ground finches: |                                     |              |              |                                     |              |              |
| (neutral)                  | 0.689 $\pm$ 0.367                   | 1.879        | 0.060        | -2.696 $\pm$ 0.345                  | -7.489       | <0.001       |
| Oily (blue)                | -0.442 $\pm$ 0.367                  | -1.206       | 0.228        | <b>0.905 <math>\pm</math> 0.433</b> | <b>2.090</b> | <b>0.037</b> |
| Bitter (green)             | <b>0.751 <math>\pm</math> 0.355</b> | <b>2.118</b> | <b>0.034</b> | -0.053 $\pm$ 0.403                  | -0.131       | 0.896        |
| Sweet (purple)             | 0.427 $\pm$ 0.353                   | 1.207        | 0.227        | <b>0.936 <math>\pm</math> 0.368</b> | <b>2.541</b> | <b>0.011</b> |
| Salty (yellow)             | 0.207 $\pm$ 0.355                   | 0.584        | 0.559        | 0.593 $\pm$ 0.399                   | 1.486        | 0.137        |
| Site - remote              | <b>1.075 <math>\pm</math> 0.359</b> | <b>2.993</b> | <b>0.003</b> | 0.565 $\pm$ 0.320                   | 1.765        | 0.078        |
| (b) Small ground finches:  |                                     |              |              |                                     |              |              |
| (neutral)                  | 1.827 $\pm$ 0.348                   | 5.258        | <0.001       | -1.815 $\pm$ 0.257                  | -7.050       | <0.001       |
| Oily (blue)                | -0.326 $\pm$ 0.428                  | -0.762       | 0.446        | 0.060 $\pm$ 0.276                   | 0.217        | 0.828        |
| Bitter (green)             | -0.152 $\pm$ 0.427                  | -0.356       | 0.722        | -0.024 $\pm$ 0.274                  | -0.087       | 0.931        |
| Sweet (purple)             | -0.092 $\pm$ 0.425                  | -0.215       | 0.830        | <b>0.489 <math>\pm</math> 0.242</b> | <b>2.017</b> | <b>0.044</b> |
| Salty (yellow)             | -0.396 $\pm$ 0.427                  | -0.929       | 0.353        | 0.121 $\pm$ 0.271                   | 0.448        | 0.654        |
| Location                   | 0.424 $\pm$ 0.319                   | 1.329        | 0.184        | 0.144 $\pm$ 0.255                   | 0.563        | 0.573        |
|                            | -0.112 $\pm$ 0.357                  | -0.315       | 0.753        | 0.438 $\pm$ 0.291                   | 1.508        | 0.132        |

497



498 Figure Legend

499 Figure 1. Differences in the (A,C) number of feeding events and (B,D) proportion of feeding  
500 events that were followed by beak-wiping by Medium ground finches presented with pastry in  
501 coloured cups with neutral (pink), oily (blue), bitter (green), sweet (purple), or salty (yellow)  
502 flavours common to human-foods in either town (●, N = 10 trials) or remote (▲, N = 16 trials)  
503 locations. A and B present the raw data, C and D present the effect sizes of the differences  
504 between each flavour and the neutral pastry, or between town and remote locations, computed  
505 from generalised linear mixed effects models (see Methods for more details). Effects that were  
506 significantly different from zero (dashed pink vertical line) are indicated by asterisks (\* 0.01 < p  
507 < 0.05, \*\* 0.001 < p < 0.01).

508

509 Figure 2. Differences in the (A,C) number of feeding events and (B,D) proportion of feeding  
510 events that were followed by beak-wiping by small ground finches presented with pastry in  
511 coloured cups with neutral (pink), oil (blue), bitter (green), sweet (purple), or salty (yellow)  
512 flavours common to human-foods in either town (●, N = 14 trials), beach (■, N = 15 trials), or  
513 remote (▲, N = 10 trials) locations. A and B present the raw data, C and D present the effect  
514 sizes of the differences between each flavour and the neutral pastry, or between town, beach, and  
515 remote locations, computed from generalised linear mixed effects models (see Methods for more  
516 details). Effects that were significantly different from zero (dashed pink vertical line) are  
517 indicated by asterisks (\* 0.01 < p < 0.05, \*\* 0.001 < p < 0.01).

518

519 **Figures**

520 Figure 1.

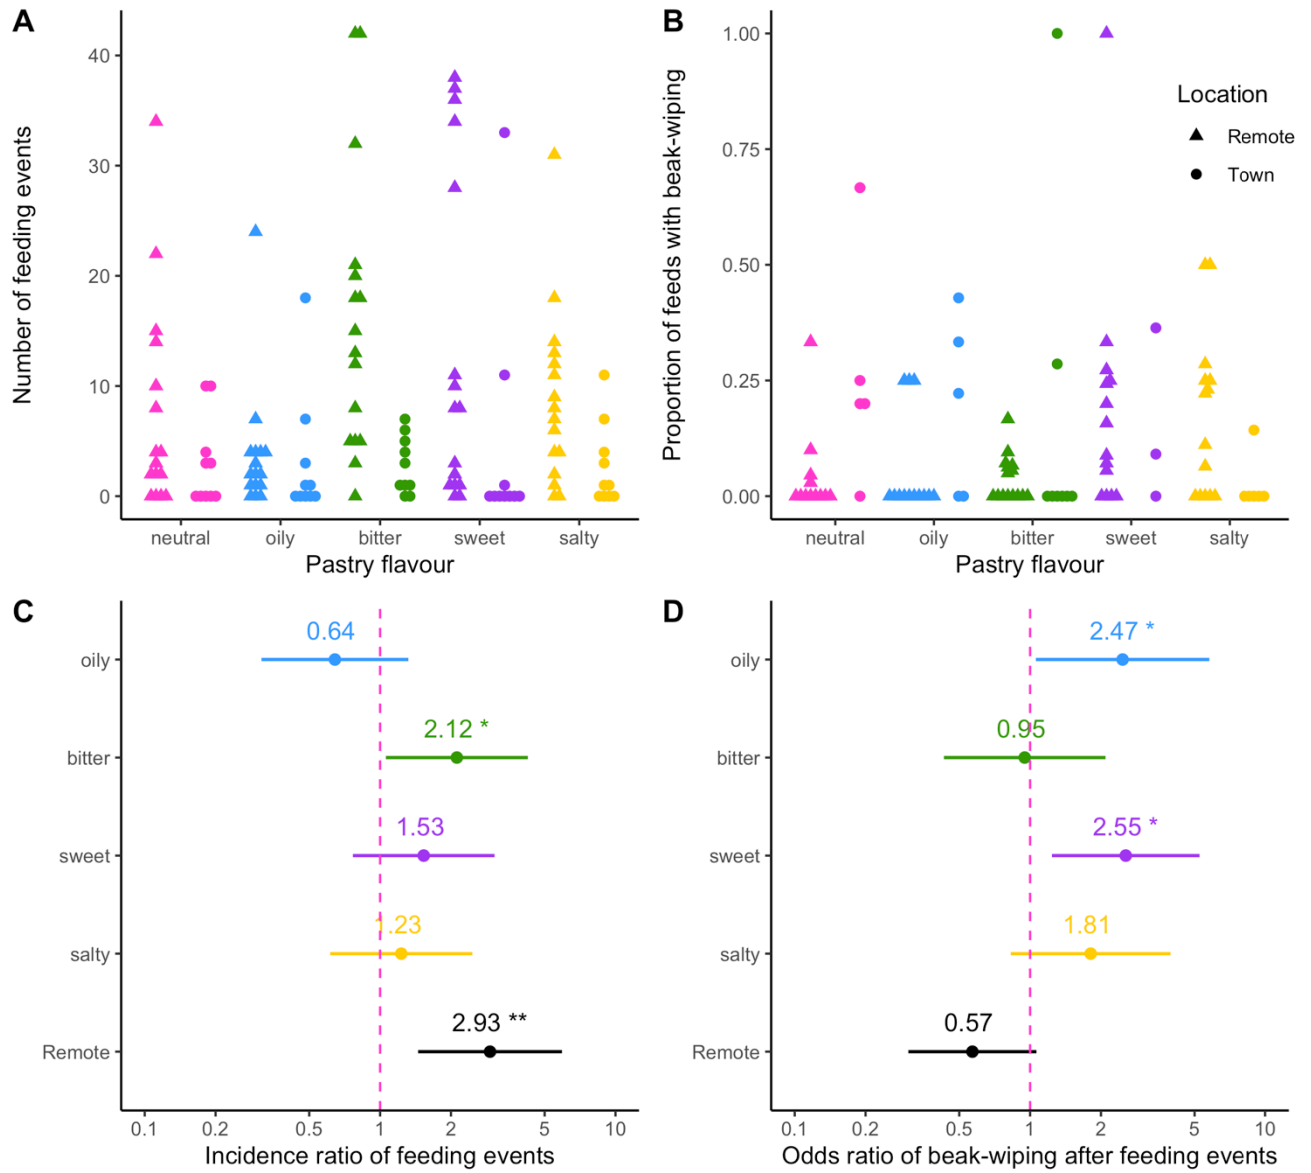

521

522

523 Figure 2.

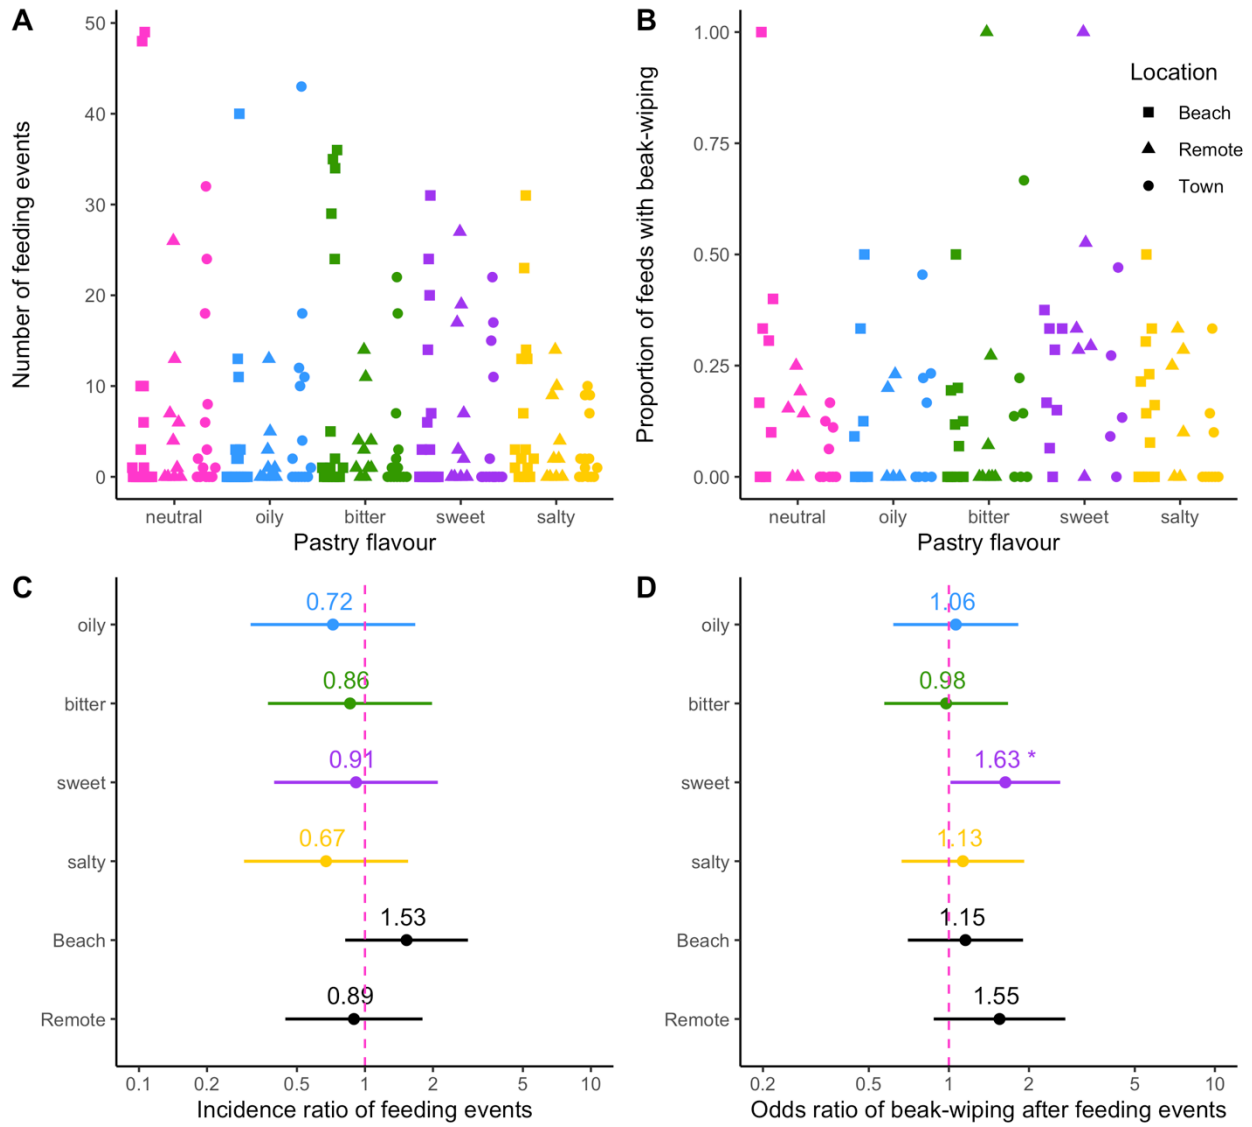

524
